# Supplementary material for: The intergenic small non-coding RNA ittA is required for optimal infectivity and tissue tropism in Borrelia burgdorferi
Source: PLoS Pathog. 2020 May 4;16(5):e1008423. doi: 10.1371/journal.ppat.1008423 (PMC7224557; doi:10.1371/journal.ppat.1008423)
Supplement: S6 Table — A total of 69 proteins were identified with a fold change cutoff of +/- 1.4 and with an adjusted p-value of <0.05 between the groups. (XLSX) [file ppat.1008423.s007.xlsx]

## Sheet: Table S6
Protein IDa	Relative protein abundance average of Parentb	Relative protein abundance average of Mutant ittAc	Parent/Mutant ratio (Fold Change)d	log2FoldChange	Adjusted p valuee
OspD	3115.53	1354.77	2.29968	1.20143	0.000829417
Oms28	2272.67	1093.17	2.07898	1.05587	0.00304768
BB_G01	719.533	443.833	1.62118	0.697044	0.0298029
Cdr	1503.27	2128.4	0.70629	-0.501668	0.0380117
BB_0330	3036.33	4309.1	0.704633	-0.505056	0.0194633
BB_I22	196.2	278.833	0.703646	-0.507078	0.0322365
MutS	651.2	926.233	0.703063	-0.508275	0.0165338
RsmH	87.2333	124.2	0.702362	-0.509714	0.0365986
BB_0729	889.733	1274.37	0.698177	-0.518336	0.0221817
BB_0017	445.2	637.733	0.698097	-0.5185	0.0193365
BB_B12	430.3	618.6	0.695603	-0.523664	0.0171315
ErpK	386.167	556.667	0.693713	-0.52759	0.0400585
MreC	171.167	246.8	0.693544	-0.527941	0.0143937
BB_0009	449.667	651	0.690732	-0.533802	0.0103026
BB_0693	2880.83	4176.13	0.689833	-0.535682	0.0245232
BB_K50	1641.9	2380.27	0.689797	-0.535757	0.0132063
BB_0569	1904.43	2764.37	0.688922	-0.537587	0.00657418
BB_K32	1602.23	2326.43	0.688708	-0.538036	0.0286952
BB_K47	1272.3	1864.77	0.682284	-0.551556	0.00408502
RecA	1189.6	1745.57	0.681498	-0.553219	0.0103341
BB_J25	564.5	836.233	0.675051	-0.566932	0.0144858
DbpA	1648.87	2449.77	0.673071	-0.57117	0.00994766
BB_A04	166.433	247.533	0.672367	-0.572678	0.0358097
BB_A65	403.633	602.6	0.66982	-0.578155	0.0130808
BB_A57	80.6667	120.567	0.669063	-0.579787	0.040683
BB_0689	369.967	561.967	0.658343	-0.603089	0.0218488
Alr	465.233	707.7	0.657388	-0.605183	0.0221892
BB_J48	523.267	796.567	0.656903	-0.606249	0.020285
BB_0246	243.867	371.667	0.656143	-0.607917	0.0150368
BB_N28	202.067	308.367	0.655281	-0.609815	0.0112644
OspC	3644.67	5576	0.653635	-0.613444	0.00370175
BB_0563	736.2	1128.63	0.652293	-0.616407	0.00502168
BB_0158	162.133	249.967	0.64862	-0.624555	0.00455449
BB_J27	512.567	794.933	0.644792	-0.633094	0.00584502
BB_0567	2247.7	3489.47	0.644139	-0.634557	0.00842155
BB_J47	44.8333	69.8667	0.641698	-0.640033	0.024713
BB_J31	72.7333	113.533	0.640634	-0.642427	0.0376462
BB_S30	22.9	35.8	0.639665	-0.644612	0.0148376
BB_0159	487.367	765.267	0.636859	-0.650955	0.0092456
BB_K07	1171	1843.53	0.635193	-0.654732	0.0158737
BB_0681	1830.6	2885.73	0.634362	-0.656621	0.0111808
BB_B09	577.267	910.867	0.633755	-0.658002	0.00921198
RecB	110.933	175.333	0.6327	-0.660407	0.000176973
BB_0565	882.933	1397.73	0.631689	-0.662713	0.0258682
Apt	809.4	1287.77	0.62853	-0.669946	0.0133837
CheR	338.933	541.833	0.625531	-0.676848	0.0101281
BB_A64	2273.07	3639.1	0.624623	-0.678942	0.0122981
BB_I21	75.4333	121.3	0.621874	-0.685305	0.00634267
RevA1	514.333	829.3	0.620202	-0.68919	0.0183604
BB_0680	2256.53	3658.9	0.616725	-0.697302	0.00680682
BB_0707	710.467	1154.17	0.615567	-0.700013	0.00632686
BB_R28	224.867	367.1	0.612549	-0.707103	0.00736224
CheB	492.933	805.2	0.612187	-0.707955	0.022571
BB_A36	298.1	487.933	0.610944	-0.710888	0.00895534
DbpB	698.133	1148.87	0.607671	-0.718637	0.0031656
BB_0314	100.533	169.433	0.59335	-0.753044	0.0016962
BB_A05	958.233	1627.83	0.588656	-0.764504	0.0109656
BB_I29	468	799.8	0.585146	-0.773131	0.00714086
BB_L28	873.867	1509.33	0.578975	-0.788426	0.00588106
BB_0400	438.433	757.933	0.578459	-0.789713	0.0326628
MlpA	706.967	1238.87	0.570656	-0.809307	0.0165605
BB_A73	866.467	1519.73	0.570144	-0.810602	0.0045645
BB_K48	30.4	53.8	0.565056	-0.823535	0.00839939
BB_0418	849.633	1524.5	0.557319	-0.843424	0.0055221
BB_A07	456.4	821.433	0.555614	-0.847845	0.00413249
BosR	430.867	783.833	0.549692	-0.863305	0.0292052
BB_A0078	181.367	335.1	0.541231	-0.885682	0.0178749
BB_A66	1815.57	3459.53	0.524801	-0.930158	0.00347462
BB_A59	274.067	546.633	0.501372	-0.996047	0.0114621
a A total of 69 proteins had a fold change of at least (+/-1.4) between the Parent vs Mutant strains. b The relative protein abundance average of the Parent samples (n=3). c The relative protein abundance average of the Mutant samples (n=3). d The fold change ratio was calculated by dividing the mean of the Parent over the mean of the Mutant (Parent/Mutant) for each protein identified. e The adju…
